# Supplementary material for: Fragmentation of Andes-to-Amazon connectivity by hydropower dams
Source: PubMed Central journal article supplement — Sci Adv. 2018 Jan 31;4(1):eaao1642. doi: 10.1126/sciadv.aao1642 (PMC5792221; doi:10.1126/sciadv.aao1642), 2018-01-31
Supplement: aao1642_SM.pdf [file aao1642_SM.pdf]

## Supplementary Materials for

### **Fragmentation of Andes-to-Amazon connectivity by hydropower dams**

Elizabeth P. Anderson, Clinton N. Jenkins, Sebastian Heilpern, Javier A. Maldonado-Ocampo, Fernando M. Carvajal-Vallejos, Andrea C. Encalada, Juan Francisco Rivadeneira, Max Hidalgo, Carlos M. Cañas, Hernan Ortega, Norma Salcedo, Mabel Maldonado, Pablo A. Tedesco

Published 31 January 2018, *Sci. Adv.* **4**, eaao1642 (2018)  
DOI: 10.1126/sciadv.aao1642

#### **This PDF file includes:**

- table S1. Hydropower dams existing, under construction, or proposed in Andean Amazon river basins.

**table S1. Hydropower dams existing, under construction, or proposed in Andean Amazon river basins.** Information in the table was sourced from existing datasets (10,12,15), from government reports, and from employees of energy authorities in Colombia, Ecuador, Peru, and Bolivia. Under Construction is abbreviated as U. Const. Data were current at the time of our analysis, but information on proposed dams changes frequently as a consequence of social, political, and economic conditions. Therefore, data on proposed dams should be rechecked frequently for currency. See end of table for additional notes.

| Name                      | Megawatts | Status    | Longitude | Latitude | Country  | Basin         | Beyond HydroSHEDS limit | Alternate names encountered |
|---------------------------|-----------|-----------|-----------|----------|----------|---------------|-------------------------|-----------------------------|
| Abitagua                  | 198.2     | Proposed  | -78.1849  | -1.4133  | Ecuador  | Marañón       |                         |                             |
| Agoyan                    | 160       | Existing  | -78.3610  | -1.3996  | Ecuador  | Marañón       |                         | Agoyán                      |
| Alao                      | 10        | Existing  | -78.5967  | -1.8083  | Ecuador  | Marañón       |                         |                             |
| Altos Machay              |           | Existing  | -75.8847  | -10.5553 | Peru     | Ucayali       | Y                       |                             |
| Ambato                    | 4         | Proposed  | -78.8133  | -1.2815  | Ecuador  | Marañón       |                         |                             |
| Ambrosia                  | 115       | Proposed  | -65.6409  | -17.0091 | Bolivia  | Mamoré        |                         | Ambrosía                    |
| Andaqui                   | 687       | Proposed  | -76.6114  | 1.0400   | Colombia | Caqueta       |                         |                             |
| Angel 1                   | 20        | U. Const. | -70.5383  | -13.6633 | Peru     | Madre de Dios |                         | Angel I                     |
| Angel 2                   | 20        | U. Const. | -70.5218  | -13.6680 | Peru     | Madre de Dios |                         | Angel II                    |
| Angel 3                   | 20        | U. Const. | -70.5061  | -13.6613 | Peru     | Madre de Dios |                         | Angel III                   |
| Angosto Chepete           | 3300      | Proposed  | -67.6670  | -14.8833 | Bolivia  | Beni          |                         |                             |
| Angosto del Bala          | 1600      | Proposed  | -67.4985  | -14.5481 | Bolivia  | Beni          |                         |                             |
| Angostura                 | 6.23      | Existing  | -67.3154  | -16.8937 | Bolivia  | Beni          | Y                       | MIGUILLAS (Angostura)       |
| Antunez de Mayolo Mantaro | 798       | Existing  | -74.7867  | -12.4642 | Peru     | Ucayali       |                         |                             |
| Ayna                      | 20        | Proposed  | -73.9049  | -12.7187 | Peru     | Ucayali       |                         |                             |
| Azulcocha                 |           | Existing  | -75.9956  | -11.9431 | Peru     | Ucayali       |                         |                             |
| Baeza                     | 50        | Proposed  | -77.9059  | -0.4591  | Ecuador  | Napo          |                         |                             |
| Balsacocha                |           | Existing  | -75.4818  | -12.5899 | Peru     | Ucayali       | Y                       |                             |

| <i>Table S1 continues</i> |                  |               |                  |                 |                |               |                                |                                    |
|---------------------------|------------------|---------------|------------------|-----------------|----------------|---------------|--------------------------------|------------------------------------|
| <b>Name</b>               | <b>Megawatts</b> | <b>Status</b> | <b>Longitude</b> | <b>Latitude</b> | <b>Country</b> | <b>Basin</b>  | <b>Beyond HydroSHEDS limit</b> | <b>Alternate names encountered</b> |
| Balsas                    | 915              | Proposed      | -78.0183         | -6.8106         | Peru           | Marañón       |                                | La Balsa (Balsas)                  |
| Banda Azul                | 91               | Proposed      | -65.7339         | -17.0364        | Bolivia        | Mamoré        |                                |                                    |
| Belo Horizonte            | 180              | Proposed      | -76.1131         | -9.2100         | Peru           | Marañón       |                                |                                    |
| Bolivar                   | 290              | Proposed      | -77.9294         | -7.1172         | Peru           | Marañón       |                                | Bolívar                            |
| Bombuscara                | 15               | Proposed      | -78.9893         | -4.1396         | Ecuador        | Marañón       |                                |                                    |
| Botijlaca                 | 6.81             | Existing      | -68.1405         | -16.1925        | Bolivia        | Beni          | Y                              | Zongo (Botijlaca)                  |
| Cachuela Esperanza        | 990              | Proposed      | -65.5852         | -10.5351        | Bolivia        | Madre de Dios |                                |                                    |
| Caclic                    | 5                | Existing      | -77.9091         | -6.1844         | Peru           | Marañón       | Y                              |                                    |
| Cahua                     | 28.02            | Existing      | -68.0146         | -16.0564        | Bolivia        | Beni          |                                | Zongo (Cahua)                      |
| Calzada                   |                  | Existing      | -75.8289         | -11.9612        | Peru           | Ucayali       | Y                              |                                    |
| Candelaria                | 4.7              | Existing      | -76.1820         | -10.6173        | Peru           | Marañón       |                                |                                    |
| Carabuco                  | 6.13             | Existing      | -67.3248         | -16.8157        | Bolivia        | Beni          | Y                              | MIGUILLAS (Carabuco)               |
| Carcapata 1               | 7.1              | Existing      | -75.5515         | -11.2555        | Peru           | Ucayali       | Y                              | CARCAPATA I                        |
| Carcapata 2               | 5.6              | Existing      | -75.5515         | -11.2537        | Peru           | Ucayali       | Y                              | CARCAPATA II                       |
| Carcapata 3               | 12.8             | U. Const.     | -75.5371         | -11.2472        | Peru           | Ucayali       | Y                              | CARCAPATA III - RER, Carcapata III |
| Cardenillo                | 340.9            | Proposed      | -78.4350         | -2.6007         | Ecuador        | Marañón       |                                | Paute Cardenillo                   |
| Carhuacochoa              |                  | Existing      | -75.9418         | -11.9347        | Peru           | Ucayali       |                                |                                    |
| Carlos Mora               | 2.4              | Existing      | -79.0643         | -3.9682         | Ecuador        | Marañón       | Y                              |                                    |
| Catachi                   | 748              | Proposed      | -78.0383         | -1.0756         | Ecuador        | Napo          |                                |                                    |
| Caullau                   |                  | Existing      | -75.8050         | -12.0002        | Peru           | Ucayali       | Y                              |                                    |
| Ccarccarcochoa            |                  | Existing      | -74.1730         | -12.8805        | Peru           | Ucayali       | Y                              |                                    |

| <i>Table S1 continues</i> |                  |               |                  |                 |                |              |                                |                                    |
|---------------------------|------------------|---------------|------------------|-----------------|----------------|--------------|--------------------------------|------------------------------------|
| <b>Name</b>               | <b>Megawatts</b> | <b>Status</b> | <b>Longitude</b> | <b>Latitude</b> | <b>Country</b> | <b>Basin</b> | <b>Beyond HydroSHEDS limit</b> | <b>Alternate names encountered</b> |
| Ccollpani                 | 49.7             | Proposed      | -72.5822         | -13.1434        | Peru           | Ucayali      |                                |                                    |
| Cebadas                   | 6.95             | Proposed      | -78.6174         | -2.0499         | Ecuador        | Marañón      |                                |                                    |
| Cedroyacu                 | 270              | Proposed      | -78.0973         | -0.8486         | Ecuador        | Napo         |                                |                                    |
| Centauro                  | 25               | Proposed      | -77.3696         | -9.1432         | Peru           | Marañón      |                                | CENTAURO I-III                     |
| Cerro El Aguila           | 402              | Proposed      | -74.7006         | -12.2241        | Peru           | Ucayali      |                                | M3-CERRO EL AGUILA                 |
| CH Marangani              | 3.3              | Existing      | -71.2985         | -14.3586        | Peru           | Ucayali      | Y                              | C.H. MARANGANI (LANGUI)            |
| Chacacocha                |                  | Existing      | -74.1683         | -12.8944        | Peru           | Ucayali      | Y                              |                                    |
| Chadin 2                  | 600              | Proposed      | -78.2624         | -6.3938         | Peru           | Marañón      |                                |                                    |
| Chaglla                   | 456              | U. Const.     | -75.8728         | -9.6066         | Peru           | Marañón      |                                | CHAGLLA (2009)                     |
| Chalpi 1                  | 36.2             | Proposed      | -78.0818         | -0.3699         | Ecuador        | Napo         |                                |                                    |
| Chalpi Grande             | 7.59             | Proposed      | -78.0826         | -0.3253         | Ecuador        | Napo         |                                |                                    |
| Chambo                    | 12.9             | Proposed      | -78.6642         | -1.8789         | Ecuador        | Marañón      |                                |                                    |
| Chaprin                   | 5.4              | Existing      | -76.1798         | -10.4624        | Peru           | Marañón      |                                |                                    |
| Chilcocochoa              |                  | Existing      | -75.4020         | -12.6965        | Peru           | Ucayali      |                                |                                    |
| Chilia                    | 181              | Proposed      | -76.8693         | -9.1145         | Peru           | Marañón      |                                |                                    |
| Chimay                    | 149              | Existing      | -75.2634         | -11.3767        | Peru           | Ucayali      |                                | CHIMAY (2007)                      |
| Chinchipe                 | 8                | Proposed      | -79.0996         | -4.6322         | Ecuador        | Marañón      | Y                              |                                    |
| Chingual                  | 25.61            | Proposed      | -77.5288         | 0.4080          | Ecuador        | Napo         |                                |                                    |
| Choclococha               |                  | Existing      | -75.0753         | -13.2385        | Peru           | Ucayali      | Y                              |                                    |
| Chojlla                   | 38.4             | Existing      | -67.7725         | -16.4125        | Bolivia        | Beni         |                                | Taquesi (Chojlla)                  |
| Chontayacu alto           | 102              | Proposed      | -76.6275         | -8.6112         | Peru           | Marañón      |                                | CHONTAYACU                         |
| Chontayacu bajo           | 272              | Proposed      | -76.5187         | -8.5463         | Peru           | Marañón      |                                | CHONTAYACU                         |

| <i>Table S1 continues</i> |           |           |           |          |         |         |                         |                             |
|---------------------------|-----------|-----------|-----------|----------|---------|---------|-------------------------|-----------------------------|
| Name                      | Megawatts | Status    | Longitude | Latitude | Country | Basin   | Beyond HydroSHEDS limit | Alternate names encountered |
| Choquetanga               | 6.2       | Existing  | -67.3155  | -16.8508 | Bolivia | Beni    | Y                       | MIGUILLAS (Choquetanga)     |
| Chorrillos                | 3.96      | U. Const. | -78.9408  | -4.1547  | Ecuador | Marañón | Y                       |                             |
| Chururaqui                | 25.39     | Existing  | -68.0707  | -16.1075 | Bolivia | Beni    |                         | Zongo (Chururaqui)          |
| Chusgon                   | 240       | Proposed  | -77.7866  | -7.4086  | Peru    | Marañón |                         | Chusgón                     |
| Coca Codo Sinclair        | 1500      | Existing  | -77.6843  | -0.1874  | Ecuador | Napo    |                         |                             |
| Collay                    | 5.8       | Proposed  | -78.6590  | -2.8023  | Ecuador | Marañón |                         |                             |
| Colpa                     | 4.8       | Proposed  | -76.2150  | -9.8749  | Peru    | Marañón | Y                       |                             |
| Complejo Rio Grande       | 3000      | Proposed  | -64.0552  | -19.0422 | Bolivia | Mamoré  |                         | Complejo Río Grande         |
| Corani                    | 54        | Existing  | -65.8955  | -17.2300 | Bolivia | Mamoré  |                         |                             |
| Cosanga                   | 27.03     | Proposed  | -77.8690  | -0.5702  | Ecuador | Napo    |                         |                             |
| Coyllorcocha              |           | Existing  | -75.5396  | -12.5809 | Peru    | Ucayali |                         |                             |
| Cuchoqueserea             |           | Existing  | -74.3446  | -13.4391 | Peru    | Ucayali |                         |                             |
| Cuquipampa                | 800       | Proposed  | -74.3190  | -12.2310 | Peru    | Ucayali |                         |                             |
| Curibamba1                | 97.5      | Proposed  | -75.2567  | -11.4206 | Peru    | Ucayali |                         |                             |
| Curibamba2                | 97.5      | Proposed  | -75.2373  | -11.4075 | Peru    | Ucayali |                         |                             |
| Cuticucho                 | 22.97     | Existing  | -68.1158  | -16.1424 | Bolivia | Beni    |                         | Zongo (Cuticucho)           |
| Cuyes                     | 50.6      | Proposed  | -78.7412  | -3.4621  | Ecuador | Marañón |                         |                             |
| Cuyes La Florida          | 33        | Proposed  | -78.7239  | -3.4693  | Ecuador | Marañón |                         |                             |
| Del Norte                 | 600       | Proposed  | -78.3089  | -6.3643  | Peru    | Marañón |                         |                             |
| Delsitanisagua            | 115       | U. Const. | -78.8703  | -3.8974  | Ecuador | Marañón |                         |                             |
| Due                       | 49.5      | U. Const. | -77.4869  | 0.0401   | Ecuador | Napo    |                         |                             |

| <i>Table S1 continues</i>    |           |          |           |          |         |         |                         |                                 |
|------------------------------|-----------|----------|-----------|----------|---------|---------|-------------------------|---------------------------------|
| Name                         | Megawatts | Status   | Longitude | Latitude | Country | Basin   | Beyond HydroSHEDS limit | Alternate names encountered     |
| El Caaro                     | 5.6       | Proposed | -79.1584  | -2.9167  | Ecuador | Marañón | Y                       |                                 |
| El Cano                      | 100       | Proposed | -75.2667  | -10.7167 | Peru    | Ucayali |                         | El Caño                         |
| El Muyo                      | 5.67      | Existing | -78.4532  | -5.4078  | Peru    | Marañón | Y                       |                                 |
| El Retorno                   | 261       | Proposed | -79.0428  | -3.9507  | Ecuador | Marañón |                         |                                 |
| Escuprebraga                 | 1800      | Proposed | -78.2506  | -4.7758  | Peru    | Marañón |                         |                                 |
| Fatima                       | 20        | Proposed | -79.1265  | -4.7184  | Ecuador | Marañón |                         | Fátima                          |
| Garibaldi                    | 192       | Proposed | -75.4123  | -11.0514 | Peru    | Ucayali |                         |                                 |
| Gera                         | 6.6       | Existing | -76.8854  | -6.1167  | Peru    | Marañón |                         |                                 |
| Gualaceo                     | 0.97      | Proposed | -78.7270  | -2.9144  | Ecuador | Marañón | Y                       |                                 |
| Gualaquiza                   | 661       | Proposed | -78.4341  | -3.1823  | Ecuador | Marañón |                         |                                 |
| Harca                        | 25.85     | Existing | -68.0444  | -16.0886 | Bolivia | Beni    |                         | Zongo (Harca)                   |
| Hidroabanico                 | 37.99     | Existing | -78.1983  | -2.2561  | Ecuador | Marañón |                         |                                 |
| Hidrogen                     | 31.4      | Proposed | -78.3820  | -2.3373  | Ecuador | Marañón |                         |                                 |
| Huacracocha                  |           | Existing | -75.1021  | -12.0429 | Peru    | Ucayali | Y                       |                                 |
| Huacracocha Dique Cierre1    |           | Existing | -75.1064  | -12.0434 | Peru    | Ucayali | Y                       | HUACRACOCHA-DIQUE DE CIERRE 1   |
| Huacracocha Dique Cierre2    |           | Existing | -75.1096  | -12.0442 | Peru    | Ucayali | Y                       | HUACRACOCHA-DIQUE DE CIERRE 2   |
| Huaji                        | 30.15     | Existing | -67.9771  | -16.0411 | Bolivia | Beni    |                         | Zongo (Huaji)                   |
| Huallacocha Alto Huallacocha |           | Existing | -76.0882  | -11.8157 | Peru    | Ucayali |                         | HUALLACOCHA ALTO / HUAYLLACOCHA |

| <i>Table S1 continues</i>                       |           |          |           |          |         |         |                         |                                                        |
|-------------------------------------------------|-----------|----------|-----------|----------|---------|---------|-------------------------|--------------------------------------------------------|
| Name                                            | Megawatts | Status   | Longitude | Latitude | Country | Basin   | Beyond HydroSHEDS limit | Alternate names encountered                            |
| Huallacocha Alto<br>Huallacocha Dique<br>Cierre |           | Existing | -76.0945  | -11.7746 | Peru    | Ucayali |                         | HUALLACOCHA<br>BAJO /<br>HUAYLLACOCHA-<br>DIQUE CIERRE |
| Huallacocha Bajo<br>Huallacocha                 |           | Existing | -76.0954  | -11.7752 | Peru    | Ucayali |                         | HUALLACOCHA<br>BAJO /<br>HUAYLLACOCHA                  |
| Huallaga                                        | 372       | Proposed | -75.9271  | -9.7958  | Peru    | Marañón |                         |                                                        |
| Huallamayo                                      | 134       | Existing | -75.7032  | -10.7582 | Peru    | Ucayali |                         |                                                        |
| Huallanca Nueva                                 | 4.3       | Existing | -76.9423  | -9.9026  | Peru    | Marañón |                         |                                                        |
| Huaracocha Ticlio                               |           | Existing | -76.1544  | -11.5964 | Peru    | Ucayali | Y                       |                                                        |
| Huarahuarco                                     |           | Existing | -71.8140  | -15.2525 | Peru    | Ucayali |                         |                                                        |
| Huarhualla                                      | 4.6       | Proposed | -78.5723  | -1.8815  | Ecuador | Marañón |                         |                                                        |
| Huasahuasi 1                                    | 7.86      | Proposed | -75.5972  | -11.2596 | Peru    | Ucayali |                         | Huasahuasi I                                           |
| Huasahuasi 2                                    | 8         | Proposed | -75.5825  | -11.2517 | Peru    | Ucayali |                         | Huasahuasi II                                          |
| Huascacocha                                     |           | Existing | -76.3796  | -11.1135 | Peru    | Ucayali |                         |                                                        |
| Huaylacancha                                    |           | Existing | -75.9105  | -11.9605 | Peru    | Ucayali | Y                       |                                                        |
| Hueghue                                         |           | Existing | -76.2813  | -11.2405 | Peru    | Ucayali |                         |                                                        |
| Hueghue Dique Cierre                            |           | Existing | -76.2800  | -11.2412 | Peru    | Ucayali |                         | HUEGHUE-DIQUE<br>DE CIERRE                             |
| Huichicocha<br>Hulchicocha                      |           | Existing | -75.5343  | -12.5625 | Peru    | Ucayali |                         | HUICHICOCHA /<br>HULCHICOCHA                           |
| Icona                                           | 102       | Proposed | -65.6914  | -17.0267 | Bolivia | Mamoré  |                         |                                                        |
| Illapani                                        | 327.8     | Proposed | -72.8942  | -12.6393 | Peru    | Ucayali |                         |                                                        |
| Illuchi 1                                       | 4.194     | Existing | -78.5285  | -0.9189  | Ecuador | Marañón | Y                       | Illuchi No. 1                                          |

| <i>Table S1 continues</i> |                  |               |                  |                 |                |               |                                |                                    |
|---------------------------|------------------|---------------|------------------|-----------------|----------------|---------------|--------------------------------|------------------------------------|
| <b>Name</b>               | <b>Megawatts</b> | <b>Status</b> | <b>Longitude</b> | <b>Latitude</b> | <b>Country</b> | <b>Basin</b>  | <b>Beyond HydroSHEDS limit</b> | <b>Alternate names encountered</b> |
| Illuchi 2                 | 5.2              | Existing      | -78.5472         | -0.9352         | Ecuador        | Marañón       | Y                              | Illuchi No. 2                      |
| Ina 65 88 90              | 380              | Proposed      | -70.0513         | -13.6081        | Peru           | Madre de Dios |                                | INA 65-88-90                       |
| Inambari                  | 1500             | Proposed      | -70.3879         | -13.1650        | Peru           | Madre de Dios |                                |                                    |
| Isimanchi                 | 51.1             | U. Const.     | -79.2398         | -4.8393         | Ecuador        | Marañón       |                                |                                    |
| Ivirizu                   | 163              | Proposed      | -65.2739         | -17.4442        | Bolivia        | Mamoré        |                                |                                    |
| Jatunyacu                 | 74.1             | Proposed      | -77.9508         | -1.0845         | Ecuador        | Napo          |                                |                                    |
| Jirau                     | 3300             | Existing      | -64.6480         | -9.2665         | Brazil         | Madeira       |                                |                                    |
| Jondachi La Merced        | 18               | Proposed      | -77.7564         | -0.8304         | Ecuador        | Napo          |                                |                                    |
| Jondachi Sardinas         | 12.6             | Proposed      | -77.7424         | -0.8584         | Ecuador        | Napo          |                                |                                    |
| Kanata                    | 7.5              | Existing      | -66.2222         | -17.3163        | Bolivia        | Mamoré        | Y                              |                                    |
| La Barquilla              | 40.1             | Proposed      | -77.4929         | 0.3247          | Ecuador        | Napo          |                                |                                    |
| La Guitarra               | 220              | Proposed      | -75.1539         | -12.9270        | Peru           | Ucayali       | Y                              | La Guitarra (Man 250)              |
| La Merced de Jondachi     | 18.3             | Proposed      | -77.7897         | -0.7813         | Ecuador        | Napo          |                                |                                    |
| La Mica                   | 9.8              | Existing      | -78.2299         | -0.5449         | Ecuador        | Napo          |                                | El Carmen                          |
| La Oroya                  | 9.48             | Existing      | -75.9124         | -11.5150        | Peru           | Ucayali       | Y                              |                                    |
| La Pelota                 | 3.18             | Existing      | -78.8386         | -5.7138         | Peru           | Marañón       | Y                              |                                    |
| La Virgen                 | 64               | Proposed      | -75.4159         | -11.1510        | Peru           | Ucayali       |                                | LA VIRGEN (2010)                   |
| Lacsacochoa               |                  | Existing      | -76.0189         | -11.7826        | Peru           | Ucayali       | Y                              |                                    |
| Langoa                    | 26               | Proposed      | -78.2722         | -0.9343         | Ecuador        | Napo          |                                |                                    |
| Langui Layo               |                  | Existing      | -71.2847         | -14.4349        | Peru           | Ucayali       |                                |                                    |
| Las Cidras                | 77.32            | Proposed      | -79.1913         | -4.8461         | Ecuador        | Marañón       |                                |                                    |
| Las Joyas                 | 61               | Proposed      | -77.6844         | -7.6136         | Peru           | Marañón       |                                |                                    |
| Las Orquideas 1           | 13.77            | Proposed      | -77.6228         | -5.6504         | Peru           | Marañón       |                                |                                    |



| <i>Table S1 continues</i> |           |           |           |          |         |         |                         |                                   |
|---------------------------|-----------|-----------|-----------|----------|---------|---------|-------------------------|-----------------------------------|
| Name                      | Megawatts | Status    | Longitude | Latitude | Country | Basin   | Beyond HydroSHEDS limit | Alternate names encountered       |
| Lavasen Quishuar          | 64.2      | Proposed  | -77.6881  | -7.5987  | Peru    | Marañón |                         | TRASVASE<br>LAVASEN<br>QUISHUAR   |
| Limon                     |           | Existing  | -79.3325  | -5.9028  | Peru    | Marañón |                         |                                   |
| Llata 1                   | 210       | Proposed  | -76.7833  | -9.4000  | Peru    | Marañón |                         |                                   |
| Llata 2                   | 200       | Proposed  | -76.7526  | -9.1854  | Peru    | Marañón |                         |                                   |
| Lligua Muyo               | 170       | Proposed  | -78.4417  | -1.3967  | Ecuador | Marañón |                         |                                   |
| Lorena                    | 650       | Proposed  | -78.3923  | -5.1739  | Peru    | Marañón |                         |                                   |
| Loreto                    | 2.3       | Existing  | -78.1454  | -0.3276  | Ecuador | Napo    | Y                       |                                   |
| Machipichu                | 161       | Existing  | -72.5336  | -13.1830 | Peru    | Ucayali |                         |                                   |
| Malpaso Modificacion      | 54.4      | Existing  | -76.0500  | -11.4048 | Peru    | Ucayali |                         |                                   |
| Manseriche                | 4500      | Proposed  | -77.5368  | -4.4724  | Peru    | Marañón |                         | PONGO DE<br>MANSERICHE            |
| Mantaro 270               | 286       | Proposed  | -74.6833  | -12.0333 | Peru    | Ucayali |                         | Man (Mantaro)<br>270              |
| Maranon                   | 96        | U. Const. | -76.7498  | -9.5650  | Peru    | Marañón |                         | MARAÑON<br>(MODIFICACION)<br>2009 |
| Marcacocha                |           | Existing  | -76.3468  | -11.3805 | Peru    | Ucayali | Y                       |                                   |
| Marcapomacocha            |           | Existing  | -76.3293  | -11.4052 | Peru    | Ucayali | Y                       |                                   |
| Marcapomacocha            |           | Existing  | -76.3676  | -11.4013 | Peru    | Ucayali | Y                       |                                   |
| Maria Jiray               | 3.59      | Existing  | -77.1995  | -9.3370  | Peru    | Marañón | Y                       |                                   |
| Mayaicu                   | 2.27      | Proposed  | -78.6041  | -3.9818  | Ecuador | Marañón | Y                       |                                   |
| Mayo 1                    | 459       | Proposed  | -76.8734  | -6.0937  | Peru    | Marañón |                         | Mayo I                            |
| Mayo 3                    | 242       | Proposed  | -76.6840  | -6.2269  | Peru    | Marañón |                         | Mayo III                          |

| <i>Table S1 continues</i> |           |           |           |          |         |         |                         |                             |
|---------------------------|-----------|-----------|-----------|----------|---------|---------|-------------------------|-----------------------------|
| Name                      | Megawatts | Status    | Longitude | Latitude | Country | Basin   | Beyond HydroSHEDS limit | Alternate names encountered |
| Mayo 4                    | 115       | Proposed  | -76.6566  | -6.2893  | Peru    | Marañón |                         | Mayo IV                     |
| Mazan                     | 150       | Proposed  | -73.1517  | -3.4518  | Peru    | Napo    |                         |                             |
| Mazar                     | 160       | Existing  | -78.6168  | -2.6301  | Ecuador | Marañón |                         | Paute Mazar                 |
| Mazar Dudas Llavircay     | 20.9      | Proposed  | -78.6152  | -2.5821  | Ecuador | Marañón |                         |                             |
| Mexico                    |           | Existing  | -66.0879  | -17.5304 | Bolivia | Mamoré  |                         |                             |
| Migullas                  | 2.55      | Existing  | -67.3248  | -16.9256 | Bolivia | Beni    | Y                       | MIGUILLAS (Miguillas)       |
| Misahualli 2              | 21.08     | Proposed  | -77.8248  | -0.8030  | Ecuador | Napo    |                         |                             |
| Misapuquio                | 3.86      | Existing  | -72.0190  | -14.6730 | Peru    | Ucayali | Y                       |                             |
| Misicuni                  | 126       | U. Const. | -66.3304  | -17.0966 | Bolivia | Beni    |                         |                             |
| Monobamba                 | 11.5      | Existing  | -75.3394  | -11.2043 | Peru    | Ucayali | Y                       |                             |
| Nahuincocha               |           | Existing  | -75.8797  | -11.8657 | Peru    | Ucayali | Y                       |                             |
| Nahuincocha 2             |           | Existing  | -75.4358  | -12.5921 | Peru    | Ucayali | Y                       |                             |
| Naiza                     | 1039      | Proposed  | -78.2545  | -2.9198  | Ecuador | Marañón |                         |                             |
| Nanguipa                  | 2.3       | Proposed  | -78.7586  | -3.9634  | Ecuador | Marañón | Y                       |                             |
| Naranjos 2                | 5.8       | Proposed  | -77.5353  | -5.8062  | Peru    | Marañón |                         | Naranjos II                 |
| Negro                     | 97.67     | Proposed  | -78.4216  | -2.7500  | Ecuador | Marañón |                         |                             |
| Normandia                 | 38.1      | Proposed  | -78.3221  | -2.1823  | Ecuador | Marañón |                         |                             |
| Numbala                   | 39.2      | Proposed  | -79.0389  | -4.3393  | Ecuador | Marañón |                         |                             |
| Oreja de Perro            | 350       | Proposed  | -73.4961  | -13.3959 | Peru    | Ucayali |                         |                             |
| Oreja De Perro 2          | 100       | Proposed  | -73.2600  | -13.3891 | Peru    | Ucayali |                         | Oreja De Perro 1            |
| Oyacachi                  | 1         | Existing  | -78.1568  | -0.2320  | Ecuador | Napo    | Y                       |                             |
| Paccha                    |           | Existing  | -75.2621  | -11.7220 | Peru    | Ucayali | Y                       |                             |
| Pachacacha Modific.       | -         | Existing  | -76.1160  | -11.7108 | Peru    | Ucayali |                         |                             |

| <i>Table S1 continues</i>  |           |           |           |          |         |         |                         |                              |
|----------------------------|-----------|-----------|-----------|----------|---------|---------|-------------------------|------------------------------|
| Name                       | Megawatts | Status    | Longitude | Latitude | Country | Basin   | Beyond HydroSHEDS limit | Alternate names encountered  |
| Pachacacha1                | -         | Existing  | -76.0875  | -11.5921 | Peru    | Ucayali |                         |                              |
| Pachalaca                  | 100       | Proposed  | -67.8124  | -15.7200 | Bolivia | Beni    |                         |                              |
| Pacobamba                  | 98.7      | Proposed  | -73.1298  | -13.4835 | Peru    | Ucayali |                         |                              |
| Palanda                    | 16.8      | Proposed  | -79.1260  | -4.6528  | Ecuador | Marañón |                         |                              |
| Palillada                  | 116       | U. Const. | -67.3525  | -16.6531 | Bolivia | Beni    |                         | MIGUILLAS (PALILLADA)        |
| Pampacocha                 |           | Existing  | -74.1575  | -12.9143 | Peru    | Ucayali | Y                       |                              |
| Pan de Azcar               | 1.85      | Proposed  | -78.5565  | -3.1320  | Ecuador | Marañón | Y                       | Pan de Azúcar                |
| Papallacta                 | 6.63      | Existing  | -78.1450  | -0.3765  | Ecuador | Napo    |                         |                              |
| Paquizapango               | 1379      | Proposed  | -74.0623  | -11.5154 | Peru    | Ucayali |                         |                              |
| Parihuana                  |           | Existing  | -71.7671  | -15.3302 | Peru    | Ucayali | Y                       |                              |
| Patas 1                    | 320       | Proposed  | -77.6243  | -7.8642  | Peru    | Marañón |                         |                              |
| Patas 2                    | 240       | Proposed  | -77.6977  | -7.5659  | Peru    | Marañón |                         |                              |
| Paute                      | 1075      | Existing  | -78.5663  | -2.5941  | Ecuador | Marañón |                         | Paute Molino                 |
| Pauya Cushabatay           | 300       | Proposed  | -75.5896  | -7.3048  | Peru    | Ucayali |                         |                              |
| Peninsula                  | 3         | Existing  | -78.6029  | -1.2403  | Ecuador | Marañón | Y                       | Península                    |
| Pias                       | 12.6      | Existing  | -77.5775  | -7.9009  | Peru    | Marañón |                         |                              |
| Pias 2                     | 16.6      | Proposed  | -77.6284  | -7.8799  | Peru    | Marañón |                         | Pias II                      |
| Pion                       | 350       | Proposed  | -78.4181  | -6.1886  | Peru    | Marañón |                         | Pión                         |
| Pongo de Aguirre           | 750       | Proposed  | -75.9086  | -6.5070  | Peru    | Marañón |                         |                              |
| Pongo de Mainique Urub 320 | 942       | Proposed  | -72.8214  | -12.2199 | Peru    | Ucayali |                         | Pongo de Mainique (Urub 320) |
| Potrero                    | 19.9      | U. Const. | -78.1146  | -7.4648  | Peru    | Marañón |                         |                              |

| <i>Table S1 continues</i> |           |           |           |          |         |               |                         |                                             |
|---------------------------|-----------|-----------|-----------|----------|---------|---------------|-------------------------|---------------------------------------------|
| Name                      | Megawatts | Status    | Longitude | Latitude | Country | Basin         | Beyond HydroSHEDS limit | Alternate names encountered                 |
| Pucara                    | 73        | Existing  | -78.4527  | -1.0711  | Ecuador | Marañón       |                         | Pucará                                      |
| Pucara 2                  | 69.9      | Proposed  | -71.3215  | -14.1020 | Peru    | Ucayali       |                         | Pucara II                                   |
| Pucara Salcca             | 150       | Proposed  | -71.2118  | -14.1779 | Peru    | Ucayali       |                         | PUCARA (MODIFICACION 2008); Pucara (Salcca) |
| Puela 2                   | 14.8      | Proposed  | -78.4581  | -1.5309  | Ecuador | Marañón       |                         |                                             |
| Pulperia                  | 220       | Proposed  | -77.2895  | -8.6006  | Peru    | Marañón       |                         | Pulperia                                    |
| Pumayacu Cachiyacu        | 80        | Proposed  | -76.5637  | -5.8612  | Peru    | Marañón       |                         |                                             |
| Pun Pun                   |           | Existing  | -76.4228  | -10.8253 | Peru    | Ucayali       |                         | PUN RUN                                     |
| Pusuno                    | 39.5      | U. Const. | -77.6178  | -0.9565  | Ecuador | Napo          |                         |                                             |
| Quehata                   | 1.88      | Existing  | -66.8485  | -17.3499 | Bolivia | Beni          | Y                       |                                             |
| Quijos                    | 50        | U. Const. | -78.0206  | -0.4165  | Ecuador | Napo          |                         |                                             |
| Quijos 1                  | 24.2      | Proposed  | -78.0224  | -0.4578  | Ecuador | Napo          |                         |                                             |
| Renovandes H1             | 20        | Proposed  | -75.2353  | -11.0000 | Peru    | Ucayali       |                         | RenovAndes H1                               |
| Rentema                   | 1525      | Proposed  | -78.4426  | -5.3177  | Peru    | Marañón       |                         |                                             |
| Restitucion               | 210.4     | Existing  | -74.6458  | -12.3404 | Peru    | Ucayali       |                         |                                             |
| Retamal                   | 188.6     | Proposed  | -72.4242  | -13.2256 | Peru    | Ucayali       |                         |                                             |
| Rio Araza                 | 120       | Proposed  | -70.5248  | -13.1941 | Peru    | Madre de Dios |                         |                                             |
| Rio Blanco                | 3.125     | Existing  | -78.5376  | -1.6574  | Ecuador | Marañón       | Y                       | Río Blanco                                  |
| Rio Madera                | 3000      | Proposed  | -65.2942  | -10.2277 | Bolivia | Madeira       |                         | RIO MADERA (Binacional)                     |
| Rio Queros                | 70        | Proposed  | -71.2142  | -13.2775 | Peru    | Madre de Dios |                         |                                             |
| Rio Verde Chico           | 10        | U. Const. | -78.3061  | -1.3885  | Ecuador | Marañón       |                         | Río Verde Chico                             |

| <i>Table S1 continues</i> |                  |               |                  |                 |                |               |                                |                                    |
|---------------------------|------------------|---------------|------------------|-----------------|----------------|---------------|--------------------------------|------------------------------------|
| <b>Name</b>               | <b>Megawatts</b> | <b>Status</b> | <b>Longitude</b> | <b>Latitude</b> | <b>Country</b> | <b>Basin</b>  | <b>Beyond HydroSHEDS limit</b> | <b>Alternate names encountered</b> |
| Rios Orientales           | 160              | Proposed      | -78.2562         | -0.6998         | Ecuador        | Napo          |                                | Ríos Orientales                    |
| Rositas                   | 400              | Proposed      | -63.5229         | -18.9277        | Bolivia        | Mamoré        |                                |                                    |
| Rupac                     | 300              | Proposed      | -77.3606         | -8.5111         | Peru           | Marañón       |                                |                                    |
| Sabanilla                 | 30               | U. Const.     | -79.0149         | -4.0438         | Ecuador        | Marañón       |                                |                                    |
| Sainani                   | 10.5             | Existing      | -68.0900         | -16.1240        | Bolivia        | Beni          | Y                              | Zongo (Sainani)                    |
| San Bartolo               | 49.95            | Existing      | -78.4134         | -2.7490         | Ecuador        | Marañón       |                                | Hidrosanbartolo                    |
| San Francisco             | 230              | Existing      | -78.2705         | -1.4129         | Ecuador        | Marañón       |                                |                                    |
| San Gaban 1               | 150              | Existing      | -70.4528         | -13.7199        | Peru           | Madre de Dios |                                | SAN GABAN 1 (PROYECTO)             |
| San Gaban 2               | 110              | Proposed      | -70.4524         | -13.6236        | Peru           | Madre de Dios |                                | SAN GABAN II                       |
| San Gaban 3               | 110              | Proposed      | -70.4224         | -13.5059        | Peru           | Madre de Dios |                                | SAN GABAN III-2009; San Gaban III  |
| San Gaban 4               | 130              | Existing      | -70.4725         | -13.7864        | Peru           | Madre de Dios |                                | SAN GABAN IV                       |
| San Jose                  | 124              | U. Const.     | -65.7836         | -17.1049        | Bolivia        | Mamoré        |                                |                                    |
| San Jose                  | 2.24             | Existing      | -76.2701         | -10.5001        | Peru           | Marañón       | Y                              |                                    |
| San Mateo                 | 9.27             | Proposed      | -77.7952         | -0.3149         | Ecuador        | Napo          | Y                              |                                    |
| San Pablo                 | 390              | Proposed      | -77.5175         | -8.2721         | Peru           | Marañón       |                                |                                    |
| Sandia Ina 30 Ina 40      | 315              | Proposed      | -69.2991         | -13.9757        | Peru           | Madre de Dios |                                |                                    |
| Sangrar                   |                  | Existing      | -76.3161         | -11.4915        | Peru           | Ucayali       |                                |                                    |
| Santa Catalina            | 4                | Proposed      | -75.5771         | -6.8791         | Peru           | Ucayali       | Y                              |                                    |
| Santa Cruz                | 129              | Proposed      | -78.4886         | -3.6803         | Ecuador        | Marañón       |                                |                                    |
| Santa Isabel              | 93               | Existing      | -65.8233         | -17.1916        | Bolivia        | Mamoré        |                                |                                    |
| Santa Maria               | 750              | Proposed      | -73.7349         | -13.2057        | Peru           | Ucayali       |                                |                                    |

| <i>Table S1 continues</i>   |           |           |           |          |         |         |                         |                                |
|-----------------------------|-----------|-----------|-----------|----------|---------|---------|-------------------------|--------------------------------|
| Name                        | Megawatts | Status    | Longitude | Latitude | Country | Basin   | Beyond HydroSHEDS limit | Alternate names encountered    |
| Santa Rosa Bolivia          | 17        | Existing  | -68.1095  | -16.1318 | Bolivia | Beni    |                         | Zongo (Santa Rosa); Santa Rosa |
| Santa Rosa Peru             | 340       | Proposed  | -78.0396  | -6.7182  | Peru    | Marañón |                         | Santa Rosa                     |
| Santa Teresa                | 90.7      | Proposed  | -72.6241  | -13.0700 | Peru    | Ucayali |                         |                                |
| Santa Teresa 2              | 49.7      | Proposed  | -72.5596  | -13.1740 | Peru    | Ucayali |                         | Santa Teresa II                |
| Santo Antônio               | 3150      | Existing  | -63.9497  | -8.8011  | Brazil  | Madeira |                         |                                |
| Sardinas                    | 4         | Proposed  | -77.8438  | -0.3752  | Ecuador | Napo    |                         |                                |
| Saucay                      | 24        | Existing  | -79.0131  | -2.7549  | Ecuador | Marañón |                         |                                |
| Sausa Huarangalle           | 268       | Proposed  | -72.0043  | -13.7777 | Peru    | Ucayali |                         | Sausa y Huarangalle            |
| Saymirin                    | 14.432    | Existing  | -79.0077  | -2.8001  | Ecuador | Marañón |                         | Saymirín                       |
| Saymirin V                  | 7         | U. Const. | -79.0074  | -2.7971  | Ecuador | Marañón |                         |                                |
| Shincata                    | 14.3      | Proposed  | -79.0064  | -3.4971  | Ecuador | Marañón |                         |                                |
| Sibinacocha                 |           | Existing  | -71.0158  | -13.9208 | Peru    | Ucayali | Y                       |                                |
| Sibinacocha Dique de Cierre |           | Existing  | -71.0057  | -13.9016 | Peru    | Ucayali |                         |                                |
| Sicaya Huarisca             | 3.84      | Existing  | -75.3503  | -12.0534 | Peru    | Ucayali |                         |                                |
| Sizaplaya                   | 52.08     | Proposed  | -77.9628  | -0.4360  | Ecuador | Napo    |                         |                                |
| Soldados Yanuncay Minas     | 27.8      | Proposed  | -79.0901  | -2.8657  | Ecuador | Marañón |                         |                                |
| Sonaderos                   | 70.82     | Proposed  | -79.0008  | -4.0383  | Ecuador | Marañón |                         |                                |
| Sopladora                   | 487       | Proposed  | -78.4628  | -2.5876  | Ecuador | Marañón |                         |                                |
| Sucua                       | 31.62     | Proposed  | -78.1740  | -2.4730  | Ecuador | Marañón |                         |                                |
| Sumabeni                    | 1074      | Proposed  | -74.0731  | -12.1647 | Peru    | Ucayali |                         |                                |
| Tambo 40                    | 1286      | Proposed  | -73.6718  | -11.2573 | Peru    | Ucayali |                         | Tam40                          |

| <i>Table S1 continues</i> |                  |               |                  |                 |                |              |                                |                                            |
|---------------------------|------------------|---------------|------------------|-----------------|----------------|--------------|--------------------------------|--------------------------------------------|
| <b>Name</b>               | <b>Megawatts</b> | <b>Status</b> | <b>Longitude</b> | <b>Latitude</b> | <b>Country</b> | <b>Basin</b> | <b>Beyond HydroSHEDS limit</b> | <b>Alternate names encountered</b>         |
| Tambo 60                  | 579              | Proposed      | -73.7600         | -10.7917        | Peru           | Ucayali      |                                |                                            |
| Tambo Puerto Prado        | 629              | Proposed      | -74.2273         | -11.1466        | Peru           | Ucayali      |                                |                                            |
| Tembladera                |                  | Existing      | -75.9818         | -11.9497        | Peru           | Ucayali      | Y                              |                                            |
| Tiquimani                 | 9.72             | Existing      | -68.1235         | -16.2073        | Bolivia        | Beni         | Y                              | Zongo (Tiquimani)                          |
| Tomebamba                 | 6                | Proposed      | -79.0820         | -2.8458         | Ecuador        | Marañón      |                                |                                            |
| Topo                      | 28.05            | Existing      | -78.1930         | -1.4097         | Ecuador        | Marañón      |                                |                                            |
| Tulpac Palenque Pusac     | 20               | Proposed      | -77.9841         | -6.9627         | Peru           | Marañón      |                                | TULPAC - PALENQUE; Tulpac/Palenque (Pusac) |
| Tuminguina Papallacta     | 1.79             | Proposed      | -78.1344         | -0.3763         | Ecuador        | Napo         | Y                              |                                            |
| Tunantza                  | 47.6             | Proposed      | -78.9481         | -3.7563         | Ecuador        | Marañón      |                                |                                            |
| Uchuhuerta                | 30               | Existing      | -75.7631         | -10.6621        | Peru           | Ucayali      |                                |                                            |
| Umpacala                  | 84               | U.Const.      | -67.3685         | -16.7400        | Bolivia        | Beni         |                                | MIGUILLAS (UMAPALCA)                       |
| Upamayo                   |                  | Existing      | -76.2791         | -10.9236        | Peru           | Ucayali      |                                |                                            |
| Valldolid                 | 22.32            | Proposed      | -79.1306         | -4.5478         | Ecuador        | Marañón      |                                | Valladolid                                 |
| Velille                   | 20               | Proposed      | -71.9759         | -13.8228        | Peru           | Ucayali      |                                |                                            |
| Veracruz                  | 730              | Proposed      | -78.5544         | -6.0719         | Peru           | Marañón      |                                |                                            |
| Verdeyacu Chico           | 1173             | Proposed      | -77.9979         | -0.9924         | Ecuador        | Napo         |                                |                                            |
| Vichecochoa               |                  | Existing      | -75.8711         | -11.8786        | Peru           | Ucayali      |                                |                                            |
| Victoria Quijos           | 10               | Existing      | -77.9962         | -0.3661         | Ecuador        | Napo         | Y                              | Victoria                                   |
| Vilcanota 4               | 62.06            | Proposed      | -72.6256         | -13.0374        | Peru           | Ucayali      |                                |                                            |
| Vilcanota 5               | 19.42            | Proposed      | -72.6366         | -13.0122        | Peru           | Ucayali      |                                |                                            |

| <i>Table S1 continues</i> |           |          |           |          |         |         |                         |                             |
|---------------------------|-----------|----------|-----------|----------|---------|---------|-------------------------|-----------------------------|
| Name                      | Megawatts | Status   | Longitude | Latitude | Country | Basin   | Beyond HydroSHEDS limit | Alternate names encountered |
| Vizcatan                  | 750       | Proposed | -74.1879  | -12.3090 | Peru    | Ucayali |                         | Vizcatán                    |
| Yanacachi                 | 50        | Existing | -67.7376  | -16.3879 | Bolivia | Beni    |                         | Taquesi (Yanacachi)         |
| Yanacocha Palcon          |           | Existing | -76.2877  | -11.1180 | Peru    | Ucayali | Y                       |                             |
| Yanacocha Palpahualo      |           | Existing | -76.3207  | -11.3240 | Peru    | Ucayali | Y                       |                             |
| Yanacocha Razuhuilca      |           | Existing | -74.1450  | -12.9040 | Peru    | Ucayali | Y                       |                             |
| Yanamayo                  | 160       | Proposed | -77.1900  | -8.8224  | Peru    | Marañón |                         |                             |
| Yanango                   | 40.5      | Existing | -75.4602  | -11.1851 | Peru    | Ucayali |                         |                             |
| Yangas                    | 330       | Proposed | -78.3339  | -6.3451  | Peru    | Marañón |                         |                             |
| Yaupi Modif 2008          | 108       | Existing | -75.9150  | -10.5586 | Peru    | Ucayali | Y                       |                             |
| Yuncan                    | 130       | Existing | -75.6515  | -10.7194 | Peru    | Ucayali |                         |                             |
| Yungantza                 | 10        | Proposed | -78.3815  | -2.8840  | Ecuador | Marañón |                         |                             |
| Yuracocha                 |           | Existing | -75.8444  | -11.8857 | Peru    | Ucayali | Y                       |                             |
| Yurajcocha                |           | Existing | -75.4991  | -12.5312 | Peru    | Ucayali |                         |                             |
| Zamora Salto 1            | 924       | Proposed | -78.4201  | -3.1586  | Ecuador | Marañón |                         | Santiago G9                 |
| Zamora Salto 2            | 917       | Proposed | -78.3681  | -3.0656  | Ecuador | Marañón |                         |                             |
| Zamora Salto 3            | 1015      | Proposed | -78.3079  | -3.0430  | Ecuador | Marañón |                         | Santiago G10                |
| Zamora San Juan Bosco     | 1028      | Proposed | -78.4566  | -3.2283  | Ecuador | Marañón |                         |                             |
| Zongo                     | 11        | Existing | -68.1227  | -16.2719 | Bolivia | Beni    | Y                       | Zongo (Zongo)               |

**Additional Notes:** Information received post peer review suggests a possible change in status for a few of the dams on this list; users of these data should verify. (1) Cardenillo and Normandia: may be under construction soon; (2) Mazar Dudas Llavircay, Sopladora, Guacaleo may be existing; (3) Isimachi may still be pre-construction; (4) Naiza may no longer be an active proposal; and (5) La Mica may be the name of the reservoir; El Carmen could be the dam.
